# Supplementary material for: Expert consensus and operational guidelines on exercise rehabilitation of chronic obstructive pulmonary disease with integrating traditional Chinese medicine and Western medicine
Source: PubMed Central journal article supplement — J Thorac Dis. 2021 Jun;13(6):3323–46. doi: 10.21037/jtd-21-431 (PMC8264703; doi:10.21037/jtd-21-431), 2021-06
Supplement: jtd-13-06-3323-supplementary.pdf [file jtd-13-06-3323-supplementary.pdf]

**Supplementary****Table S1** Borg dyspnea scale

| Grade | Degree                             |
|-------|------------------------------------|
| 0     | None                               |
| 0.5   | Extremely slight (just noticeable) |
| 1     | Very slight                        |
| 2     | Slight                             |
| 3     | Moderate                           |
| 4     | Somewhat severe                    |
| 5     | Severe                             |
| 6     | Between 5 and 7                    |
| 7     | Very severe                        |
| 8     | Between 7 and 9                    |
| 9     | Extremely severe                   |
| 10    | Maximal                            |

**Table S2** MMT grading standard

| Grade | Definition                                                                 | Percentage of normal strength |
|-------|----------------------------------------------------------------------------|-------------------------------|
| 0     | Undetectable muscle contraction                                            | 0                             |
| 1     | Slight constriction, but no joint movement                                 | 10                            |
| 2     | Muscle moves the joint when gravity is eliminated                          | 25                            |
| 3     | Muscle moves the joint fully against gravity but cannot against resistance | 50                            |
| 4     | Muscle moves the joint against gravity and moderate resistance             | 75                            |
| 5     | Normal strength                                                            | 100                           |
